# Supplementary material for: Die Abdominal Pain Unit als Behandlungspfad
Source: Springer Nature journal article supplement (doi:10.1007/s00063-021-00887-0), 2021-12-20
Supplement: MOESM1 [file 19969488]

## Online-Zusatzmaterial

### Standard Operating Procedures der Abdominal Pain Unit

| Tab. S1 Checkliste Anamnese Bauchschmerzen                                                                                                                                                                                                                                                                                                                                                                                                                                                                                                                                                                                                                                                                                                                                                                                       |
|----------------------------------------------------------------------------------------------------------------------------------------------------------------------------------------------------------------------------------------------------------------------------------------------------------------------------------------------------------------------------------------------------------------------------------------------------------------------------------------------------------------------------------------------------------------------------------------------------------------------------------------------------------------------------------------------------------------------------------------------------------------------------------------------------------------------------------|
| Informationstext für App                                                                                                                                                                                                                                                                                                                                                                                                                                                                                                                                                                                                                                                                                                                                                                                                         |
| <ul style="list-style-type: none"> <li>• Voroperationen</li> <li>• Vorerkrankungen</li> <li>• Schmerzauslöser und Schmerzbeginn</li> <li>• Begleitende Symptome (Sodbrennen, Schluckauf)</li> <li>• Bekannter Schmerz (Vor-Therapien/Befunde)</li> <li>• Schmerzqualität<br/>(kolik-/wellenartig, lokalisierbar/diffus, stechend/stumpf, Schmerzbeeinflussung (Verstärkung: Husten, Nahrung, Bewegung, Atmen; Abschwächung: Nahrung, Erbrechen, Stuhlgang, Schonhaltung) Dauerschmerz, Schmerzmaximum, freies Intervall, Schmerzwanderung/Ausstrahlung)</li> <li>• Erbrechen/Übelkeit</li> <li>• Stuhlgang/Miktion (wann zuletzt, Blut, Farbe, Menge)</li> <li>• Gewichtsverlauf</li> <li>• Schwangerschaften/letzte Periode</li> <li>• Letzte Mahlzeit</li> <li>• Auslandsaufenthalt</li> <li>• Medikamentenanamnese</li> </ul> |

| Tab. S2 SOP Anamnese und körperliche Untersuchung                                                                                                                                                                                                                                                                                                                                                                                                                                                                                                                 |                                                                                                                                                                                                                                                                                                                                                                                                                                                                                                                                                                                                                                                                                                                                                                                                                                    |
|-------------------------------------------------------------------------------------------------------------------------------------------------------------------------------------------------------------------------------------------------------------------------------------------------------------------------------------------------------------------------------------------------------------------------------------------------------------------------------------------------------------------------------------------------------------------|------------------------------------------------------------------------------------------------------------------------------------------------------------------------------------------------------------------------------------------------------------------------------------------------------------------------------------------------------------------------------------------------------------------------------------------------------------------------------------------------------------------------------------------------------------------------------------------------------------------------------------------------------------------------------------------------------------------------------------------------------------------------------------------------------------------------------------|
| Informationstext aus der App                                                                                                                                                                                                                                                                                                                                                                                                                                                                                                                                      | Items Auswahl in der APP                                                                                                                                                                                                                                                                                                                                                                                                                                                                                                                                                                                                                                                                                                                                                                                                           |
| <p>1. Checkliste Anamnese Bauchschmerz zur Kenntnis nehmen, insbesondere:</p> <ul style="list-style-type: none"> <li>○ Schmerzqualität/-lokalisierung/-intensität zur Fokussierung der körperlichen Untersuchung</li> </ul> <p>2. Körperliche Untersuchung durchführen</p> <ul style="list-style-type: none"> <li>○ Erneute Würdigung der Vitalparameter (HF, RR, AF, SaO<sub>2</sub>, Temperatur, qSOFA)</li> <li>○ Peritonismuszeichen</li> <li>○ Blutungszeichen</li> <li>○ Ischämiezeichen</li> <li>○ Cave besondere Patientengruppen (Schwangere,</li> </ul> | <p><b><u>Cor:</u></b></p> <ul style="list-style-type: none"> <li><input type="checkbox"/> rein</li> <li><input type="checkbox"/> rhythmisch</li> <li><input type="checkbox"/> arrhythmisch</li> <li><input type="checkbox"/> Systholikum</li> <li><input type="checkbox"/> Diastholikum <ul style="list-style-type: none"> <li>○ Punctum maximum <ul style="list-style-type: none"> <li>▪ Mitrale</li> <li>▪ Aortale</li> <li>▪ Trikuspidale</li> <li>▪ Pulmonale</li> </ul> </li> </ul> </li> </ul> <p><b><u>Pulmo:</u></b></p> <p>Atemgeräusch</p> <ul style="list-style-type: none"> <li><input type="checkbox"/> Vesikulär</li> <li><input type="checkbox"/> Bronchial</li> <li><input type="checkbox"/> Verschärft</li> <li><input type="checkbox"/> Abgeschwächt</li> </ul> <p><b><u>Abdomen:</u></b></p> <p>Inspektion:</p> |

|                                                                                                                                                                                                                                                                                                                                                                                                                                                                                                                                                                                                                                                                                                                                                                                                                                                                                                                                                                                                                                                                 |                                                                                                                                                                                                                                                                                                                                                                                                                                                                                                                                                                                                                                                                                                                                                                                                                                                                                                                                                                                                                                                                                                                                                                                                                                                                                                                                                                                                                                                                                                          |
|-----------------------------------------------------------------------------------------------------------------------------------------------------------------------------------------------------------------------------------------------------------------------------------------------------------------------------------------------------------------------------------------------------------------------------------------------------------------------------------------------------------------------------------------------------------------------------------------------------------------------------------------------------------------------------------------------------------------------------------------------------------------------------------------------------------------------------------------------------------------------------------------------------------------------------------------------------------------------------------------------------------------------------------------------------------------|----------------------------------------------------------------------------------------------------------------------------------------------------------------------------------------------------------------------------------------------------------------------------------------------------------------------------------------------------------------------------------------------------------------------------------------------------------------------------------------------------------------------------------------------------------------------------------------------------------------------------------------------------------------------------------------------------------------------------------------------------------------------------------------------------------------------------------------------------------------------------------------------------------------------------------------------------------------------------------------------------------------------------------------------------------------------------------------------------------------------------------------------------------------------------------------------------------------------------------------------------------------------------------------------------------------------------------------------------------------------------------------------------------------------------------------------------------------------------------------------------------|
| <p>immunsupprimierte/ältere Patienten)</p> <ul style="list-style-type: none"> <li>○ Alle 4 Quadranten: <ul style="list-style-type: none"> <li>- Inspektion: prall, marmoriert, Venenzeichnung, Narben, Hernien, Stoma, Drainagen, Katheter</li> <li>- Palpation: bretthart, „Gummibauch“, Loslassschmerz, Abwehrspannung u/o Druckschmerz (lokalisiert/diffus), Leberrand (nach kaudal tastbar, derb, Milz tastbar, Flankenklopfeschmerz (einseitig/beidseits), pralle Blase, insgesamt tastbare Resistenzen, Murphy-/Appendizitiszeichen</li> <li>- Perkussion: tympanischer Klopfeschall, auslösbarer Peritonismus (diffus/lokalisiert)</li> <li>- Auskultation: Darmgeräusche (DG) vorhanden (regelrecht/rege) oder nicht vorhanden (still), hochklingende DG</li> </ul> </li> <li>○ Begleitende Allgemeinbefunde: obere Einflusstauung, Leberhautzeichen, Ernährungszustand (adipös/kachektisch), (Skleren-)Ikterus, (Schleimhaut-/Lippen-)Blässe, dünnes Haar, Nageldystrophie, periphere Ödeme</li> <li>○ Digital rektale Untersuchung erwägen</li> </ul> | <ul style="list-style-type: none"> <li><input type="checkbox"/> Marmoriert</li> <li><input type="checkbox"/> Venenzeichnung</li> <li><input type="checkbox"/> Narben</li> <li><input type="checkbox"/> Hernien</li> <li><input type="checkbox"/> Stoma</li> </ul> <p>Persistaltik</p> <ul style="list-style-type: none"> <li><input type="checkbox"/> rege</li> <li><input type="checkbox"/> spärlich</li> <li><input type="checkbox"/> nicht vorhanden</li> <li><input type="checkbox"/> hochgestellte Darmgeräusche</li> </ul> <p>Palpation <span style="float: right;">weich <input type="checkbox"/></span></p> <p style="margin-left: 40px;">hart <input type="checkbox"/> Peritonismus <input type="checkbox"/></p> <p>Flankenklopfeschmerz kein <input type="checkbox"/> links <input type="checkbox"/></p> <p style="margin-left: 40px;"><input type="checkbox"/> rechts <input type="checkbox"/></p> <p>Abwehrspannung</p> <ul style="list-style-type: none"> <li><input type="checkbox"/> li.OQ</li> <li><input type="checkbox"/> re.OQ</li> <li><input type="checkbox"/> li. UQ</li> <li><input type="checkbox"/> re.UQ</li> </ul> <p>Druckdolenz</p> <ul style="list-style-type: none"> <li><input type="checkbox"/> li.OQ</li> <li><input type="checkbox"/> re.OQ</li> <li><input type="checkbox"/> li. UQ</li> <li><input type="checkbox"/> re.UQ</li> </ul> <p>Perkussion: tympanisch <input type="checkbox"/></p> <p style="margin-left: 40px;">unauffällig <input type="checkbox"/></p> |
|-----------------------------------------------------------------------------------------------------------------------------------------------------------------------------------------------------------------------------------------------------------------------------------------------------------------------------------------------------------------------------------------------------------------------------------------------------------------------------------------------------------------------------------------------------------------------------------------------------------------------------------------------------------------------------------------------------------------------------------------------------------------------------------------------------------------------------------------------------------------------------------------------------------------------------------------------------------------------------------------------------------------------------------------------------------------|----------------------------------------------------------------------------------------------------------------------------------------------------------------------------------------------------------------------------------------------------------------------------------------------------------------------------------------------------------------------------------------------------------------------------------------------------------------------------------------------------------------------------------------------------------------------------------------------------------------------------------------------------------------------------------------------------------------------------------------------------------------------------------------------------------------------------------------------------------------------------------------------------------------------------------------------------------------------------------------------------------------------------------------------------------------------------------------------------------------------------------------------------------------------------------------------------------------------------------------------------------------------------------------------------------------------------------------------------------------------------------------------------------------------------------------------------------------------------------------------------------|

| Tab. S3 SOP Konsil                                             |                                              |
|----------------------------------------------------------------|----------------------------------------------|
| Informationstext aus der APP                                   | Items Auswahl in der APP                     |
| 1. Hinweise auf eine <b>urologische</b> Ursache der Schmerzen? | <input type="checkbox"/> Gesicherte Diagnose |

|                                                                                                                                                                                                                                                                                                                                                                                                                                                                                                                                                                                                                                                                                                                                                                                                                                                                                                                                                                                                                                                                                                                                                                                                                                            |                                                                                                                                               |
|--------------------------------------------------------------------------------------------------------------------------------------------------------------------------------------------------------------------------------------------------------------------------------------------------------------------------------------------------------------------------------------------------------------------------------------------------------------------------------------------------------------------------------------------------------------------------------------------------------------------------------------------------------------------------------------------------------------------------------------------------------------------------------------------------------------------------------------------------------------------------------------------------------------------------------------------------------------------------------------------------------------------------------------------------------------------------------------------------------------------------------------------------------------------------------------------------------------------------------------------|-----------------------------------------------------------------------------------------------------------------------------------------------|
| <ul style="list-style-type: none"> <li>- Flankenschmerz/Leistenschmerz/Nierenbeckenklopfeschmerz</li> <li>- Dysurie, Algurie</li> <li>- Makro-, Mikrohämaturie</li> <li>- Anamnese, körperliche Untersuchung mit wegweisendem Befund</li> <li>- Sonographisch wegweisender Befund</li> <li>- Bekannte urologische Erkrankung mit Potential zur Akutkomplikation</li> </ul> <p>Kontaktdaten: Eingabe Klinikspezifisch</p> <p>2. Hinweise auf eine <b>gynäkologische</b> Ursache der Schmerzen?</p> <ul style="list-style-type: none"> <li>- Bestehende Schwangerschaft, SS-Test durchgeführt? EUG möglich?</li> <li>- Vaginale Blutungen</li> <li>- Anamnese (GV, IUP), körperliche Untersuchung mit wegweisendem Befund</li> <li>- Sonographisch wegweisender Befund</li> <li>- Bekannte gynäkologische Erkrankung mit Potential zur Akutkomplikation</li> </ul> <p>Kontaktdaten: Eingabe Klinikspezifisch</p> <p>3. <b>Allgemein/Viszeralchirurgische</b> Vorstellung</p> <p>Falls FA Chirurgie noch nicht involviert</p> <ul style="list-style-type: none"> <li>- akutes Abdomen</li> <li>- Anamnese, körperliche Untersuchung mit wegweisendem Befund</li> <li>- Sonographisch wegweisender Befund</li> <li>- Voroperationen</li> </ul> | <input type="checkbox"/> Unklare Diagnose <ul style="list-style-type: none"> <li>• Radiologische Bildgebung</li> <li>• Observation</li> </ul> |
|--------------------------------------------------------------------------------------------------------------------------------------------------------------------------------------------------------------------------------------------------------------------------------------------------------------------------------------------------------------------------------------------------------------------------------------------------------------------------------------------------------------------------------------------------------------------------------------------------------------------------------------------------------------------------------------------------------------------------------------------------------------------------------------------------------------------------------------------------------------------------------------------------------------------------------------------------------------------------------------------------------------------------------------------------------------------------------------------------------------------------------------------------------------------------------------------------------------------------------------------|-----------------------------------------------------------------------------------------------------------------------------------------------|

| Tab. S4 SOP Labor bei akuten Bauchschmerzen                                                                                                                                                                                                                                                                                                                                           |                                                                                                                                                                                                  |
|---------------------------------------------------------------------------------------------------------------------------------------------------------------------------------------------------------------------------------------------------------------------------------------------------------------------------------------------------------------------------------------|--------------------------------------------------------------------------------------------------------------------------------------------------------------------------------------------------|
| Informationstext in der APP                                                                                                                                                                                                                                                                                                                                                           | Items Auswahl in der APP                                                                                                                                                                         |
| <p>1. Venöse Blutabnahme; arterielle Blutgasanalyse bei Hypoxie (SaO<sub>2</sub> &lt; 90%)</p> <p>2. Laborparameter (4 Röhrchen + Urin)</p> <ul style="list-style-type: none"> <li>○ Blutbild, maschinelles Differentialblutbild</li> <li>○ POC „BGA“ mit pH, Na, K, Laktat, BZ</li> <li>○ Chemie: CRP, Lipase, gGT, ALT, Bili, Krea, TSH</li> <li>○ Gerinnung: Quick, PTT</li> </ul> | <input type="checkbox"/> Gesicherte Diagnose<br><input type="checkbox"/> Unklare Diagnose<br><input type="checkbox"/> Schmerzmanagement<br>erledigt<br><input type="checkbox"/> Anamnese erhoben |

|                                                                                                                   |  |
|-------------------------------------------------------------------------------------------------------------------|--|
| <ul style="list-style-type: none"> <li>○ Urin-Stix</li> <li>Bei Frauen: <math>\beta</math>-HCG im Urin</li> </ul> |  |
|-------------------------------------------------------------------------------------------------------------------|--|

| Tab. S5 SOP Observation                                                                                                                                                                                                                                                                                                                                                                                                                                                                                                                                                                                                                                                                                                                                                                                                                                                                                                                                                                                                                                                                                                                                                                                                                                                                                                                                         |                                                                                                                                                                                                                                                                                                                      |
|-----------------------------------------------------------------------------------------------------------------------------------------------------------------------------------------------------------------------------------------------------------------------------------------------------------------------------------------------------------------------------------------------------------------------------------------------------------------------------------------------------------------------------------------------------------------------------------------------------------------------------------------------------------------------------------------------------------------------------------------------------------------------------------------------------------------------------------------------------------------------------------------------------------------------------------------------------------------------------------------------------------------------------------------------------------------------------------------------------------------------------------------------------------------------------------------------------------------------------------------------------------------------------------------------------------------------------------------------------------------|----------------------------------------------------------------------------------------------------------------------------------------------------------------------------------------------------------------------------------------------------------------------------------------------------------------------|
| Informationstext aus der APP                                                                                                                                                                                                                                                                                                                                                                                                                                                                                                                                                                                                                                                                                                                                                                                                                                                                                                                                                                                                                                                                                                                                                                                                                                                                                                                                    | Items Auswahl in der APP                                                                                                                                                                                                                                                                                             |
| <p><b>Monitoring</b></p> <p><b>A Zeichen eines Kreislaufschocks sind nicht vorhanden initiale Messung, Wiederholung nach jeweils 30min (*): RR*, HF*, je nach klinischem Befund: Sauerstoffsättigung, 12-Kanal-EKG-Ableitung; Wiederholung bei Infarktverdacht mindestens nach 3 und 6 Stunden, Temperatur (temporal oder rektal; bei Verfügbarkeit am Urindauerkatheter)</b></p> <p><b>B Zeichen eines Kreislaufschocks vorhanden:</b> Durchgehende Monitorüberwachung bis zur Verlegung auf die Intensivstation: RR, HF, Sauerstoffsättigung, EKG-Ableitung</p> <ul style="list-style-type: none"> <li>- <b>Klinische Visite</b> <ul style="list-style-type: none"> <li>○ Dokumentation des Verlaufs (Zeitintervall je nach klinischer Ausgangslage explizit planen und dokumentieren): <ul style="list-style-type: none"> <li>- Symptomatik</li> <li>- klinischer Untersuchungsbefund</li> </ul> </li> <li>○ Pflegerische Überwachung, regelmäßige Ansprache</li> </ul> </li> <li>- <b>Abschließende Wertung</b> durch den verantwortlichen Facharzt unter Einbeziehung aller erhobenen Untersuchungsbefunde gemäß „SOP Klinische Einschätzung“ und Festlegung des Procedere: <ul style="list-style-type: none"> <li>○ Entlassung</li> <li>○ Weiterführende Diagnostik (Labor, Bildgebung, Endoskopie)</li> <li>○ Stationäre Aufnahme</li> </ul> </li> </ul> | <ul style="list-style-type: none"> <li><input type="checkbox"/> Entlassung</li> <li><input type="checkbox"/> Weiterführende Diagnostik (Labor, Bildgebung, Endoskopie, Konsil)</li> <li><input type="checkbox"/> Stationäre Aufnahme</li> <li><input type="checkbox"/> Notfall-OP/Endoskopie/Intervention</li> </ul> |

|                                |  |
|--------------------------------|--|
| ○ <b>Notfall-OP/Endoskopie</b> |  |
|--------------------------------|--|

| <b>Tab. S6 SOP Radiologische Bildgebung</b>                                                                                                                                                                                                                                                                                                                                                                                                                                                                                                                                                                                                                                              |                                                                                                                                                                                                                                                                                                     |
|------------------------------------------------------------------------------------------------------------------------------------------------------------------------------------------------------------------------------------------------------------------------------------------------------------------------------------------------------------------------------------------------------------------------------------------------------------------------------------------------------------------------------------------------------------------------------------------------------------------------------------------------------------------------------------------|-----------------------------------------------------------------------------------------------------------------------------------------------------------------------------------------------------------------------------------------------------------------------------------------------------|
| Informationstext aus der APP                                                                                                                                                                                                                                                                                                                                                                                                                                                                                                                                                                                                                                                             | Items Auswahl in der APP                                                                                                                                                                                                                                                                            |
| <ol style="list-style-type: none"> <li>1. Indikationsstellung zur CT-Diagnostik des Abdomens mit KM <ul style="list-style-type: none"> <li>- Fragestellung</li> <li>- Dringlichkeit</li> </ul> </li> <li>2. Check KM-Allergie, Schwangerschaftstest bei gebärfähigen Frauen, TSH und Kreatinin (abhängig von der Dringlichkeit)</li> <li>3. Prüfung alternativer radiologischer Untersuchungen: <ul style="list-style-type: none"> <li>- Abdomenleeraufnahme in Linksseitenlage und AP im Liegen (nur bei Fragestellung „freie Luft“ oder Ileus „stehende Schlingen“)</li> </ul> </li> </ol> <p>- in Ausnahmefällen (z.B. schwerer KM-Allergie mit Schock) auch primäres MRT möglich</p> | <ul style="list-style-type: none"> <li><input type="checkbox"/> Gesicherte Diagnose → spezifisches Management</li> <li><input type="checkbox"/> Unklarer Diagnose <ul style="list-style-type: none"> <li>• Observation</li> <li>• Konsil</li> <li>• OP</li> <li>• Entlassung</li> </ul> </li> </ul> |

| <b>Tab. S7 SOP Schmerzmanagement</b>                                                                                                                                                                                                                                                                                                                                                                                                                                                                                                                                                                                                  |                                                                                                                                                                                                                                                                                                                                                                                                                                                                                                                                                                                                                                            |
|---------------------------------------------------------------------------------------------------------------------------------------------------------------------------------------------------------------------------------------------------------------------------------------------------------------------------------------------------------------------------------------------------------------------------------------------------------------------------------------------------------------------------------------------------------------------------------------------------------------------------------------|--------------------------------------------------------------------------------------------------------------------------------------------------------------------------------------------------------------------------------------------------------------------------------------------------------------------------------------------------------------------------------------------------------------------------------------------------------------------------------------------------------------------------------------------------------------------------------------------------------------------------------------------|
| Informationstext aus der APP                                                                                                                                                                                                                                                                                                                                                                                                                                                                                                                                                                                                          | Items Auswahl in der APP                                                                                                                                                                                                                                                                                                                                                                                                                                                                                                                                                                                                                   |
| <ol style="list-style-type: none"> <li>1. Jeder Patient mit akuten oder chronischen Schmerzen erhält ein angemessenes Schmerzmanagement.</li> <li>2. Zu verwendende Skalen zur Schmerzeinschätzung: <ul style="list-style-type: none"> <li>○ Numerische Rangskala (NRS)</li> <li>○ Visuelle Analogskala (VAS)</li> <li>○ Verbale Rating Skala (VRS) bzw. Begriffsskala</li> </ul> </li> <li>3. Patienten mit Sprachbarriere oder eingeschränkter Kommunikationsfähigkeit: <ul style="list-style-type: none"> <li>○ ALGOPLUS (Einschätzung durch Pflegefachkraft)</li> <li>○ Faces Pain Scale – Revised (FPS-R)</li> </ul> </li> </ol> | <p>Schmerzen    <input type="checkbox"/> akut    <input type="checkbox"/> chronisch</p> <p>Schmerzskala NRS</p> <p>0 _ 1 _ 2 _ 3 _ 4 _ 5 _ 6 _ 7 _ 8 _ 9 _ 10</p> <p>VAS</p> 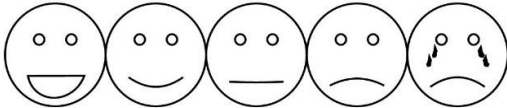 <p>vor Medikamentengabe:</p> <ul style="list-style-type: none"> <li><input type="checkbox"/> Schwangerschaft/Stillzeit</li> <li><input type="checkbox"/> Allergien</li> <li><input type="checkbox"/> Porphyrie</li> <li><input type="checkbox"/> schwere Leber- und Nierenerkrankungen</li> <li><input type="checkbox"/> Epilepsie/neurologische Erkrankungen</li> </ul> |

|                                                                                                                                                                                                                                                                                                                                                                                                                                                                                                                                                                                                                                                                                                                                                                                                                                                                                                                                                                                                                                                                                                                                                                                                                                                                                                                                                                                                |                                                                                                                                                    |
|------------------------------------------------------------------------------------------------------------------------------------------------------------------------------------------------------------------------------------------------------------------------------------------------------------------------------------------------------------------------------------------------------------------------------------------------------------------------------------------------------------------------------------------------------------------------------------------------------------------------------------------------------------------------------------------------------------------------------------------------------------------------------------------------------------------------------------------------------------------------------------------------------------------------------------------------------------------------------------------------------------------------------------------------------------------------------------------------------------------------------------------------------------------------------------------------------------------------------------------------------------------------------------------------------------------------------------------------------------------------------------------------|----------------------------------------------------------------------------------------------------------------------------------------------------|
| <p>4. Erhebung vor jeder Medikamentenverabreichung:</p> <ul style="list-style-type: none"> <li>○ Schwangerschaft/Stillzeit</li> <li>○ Allergien</li> <li>○ Porphyrie</li> <li>○ schwere Leber- und Nierenerkrankungen</li> <li>○ Epilepsie/neurologische Erkrankungen</li> <li>○ Vitalparametern</li> </ul> <p>5. Bei akuten Schmerzen und fehlenden Kontraindikationen ist die Verabreichung von Analgetika auch in Rücksprache mit dem AvD vor Arztkontakt möglich.</p> <p>6. Gleiches gilt bei fehlenden Kontraindikationen für (Dosierung siehe Schmerzschema*):</p> <ul style="list-style-type: none"> <li>○ Antiemetika*</li> <li>○ Spasmolytika*</li> <li>○ PPI*</li> </ul> <p>7. Nach 30 Minuten sollte eine erneute Abfrage anhand der Schmerzskala durchgeführt und dokumentiert werden (von Pflegekraft oder Arzt)</p> <p>8. Bei anhaltenden Schmerzen, Verschlechterung des Allgemeinzustandes ist sofort ein Arzt hinzuzuziehen.</p> <p>9. Die Abgabe von Opioiden* erfolgt ausschließlich nach Arztkontakt (Dosierung siehe Schmerzschema*).</p> <p>10. Die entsprechende Dokumentation muss in der BTM-Dokumentation und im EH-Schein erfolgen.</p> <p><b>Schmerzschema</b><br/> <b>Medikamentenoptionen</b><br/> Analgetika:</p> <ul style="list-style-type: none"> <li>○ Novaminsulfon 1,0 g oder 2,5 (Cave RR) i.v. als Kurzinfusion;<br/> Maximaldosis: 5.0 g /d</li> </ul> | <p><input type="checkbox"/> Vitalparametern</p> <p>Medikament erhalten</p> <p><input type="checkbox"/> ja</p> <p><input type="checkbox"/> nein</p> |
|------------------------------------------------------------------------------------------------------------------------------------------------------------------------------------------------------------------------------------------------------------------------------------------------------------------------------------------------------------------------------------------------------------------------------------------------------------------------------------------------------------------------------------------------------------------------------------------------------------------------------------------------------------------------------------------------------------------------------------------------------------------------------------------------------------------------------------------------------------------------------------------------------------------------------------------------------------------------------------------------------------------------------------------------------------------------------------------------------------------------------------------------------------------------------------------------------------------------------------------------------------------------------------------------------------------------------------------------------------------------------------------------|----------------------------------------------------------------------------------------------------------------------------------------------------|

|                                                                                                                                                                                                                                                                                                                                                                                                                                                                                                                                                                                                                                                                                                                                                                                                                                                                                                                       |  |
|-----------------------------------------------------------------------------------------------------------------------------------------------------------------------------------------------------------------------------------------------------------------------------------------------------------------------------------------------------------------------------------------------------------------------------------------------------------------------------------------------------------------------------------------------------------------------------------------------------------------------------------------------------------------------------------------------------------------------------------------------------------------------------------------------------------------------------------------------------------------------------------------------------------------------|--|
| <ul style="list-style-type: none"> <li>○ Paracetamol 1 g i.v. als Kurzinfusion bis 4×/Tag, Maximaldosis <a href="#">Paracetamol</a> 4,0 g/d</li> <li>○ Opiode: Piritramid (7,5 mg i.v. als Kurzinfusion über 15 min); Maximaldosis: 30 mg/d</li> </ul> <p>PPI:</p> <ul style="list-style-type: none"> <li>○ Pantoprazol 40 mg p.o. oder i.v.</li> </ul> <p>Spasmolytika:</p> <ul style="list-style-type: none"> <li>○ Butylscopolamin 20mg i.v./p.o. 3-5×/Tag, Maximaldosis 100mg/d</li> </ul> <p>Antiemetika:</p> <ul style="list-style-type: none"> <li>○ Metoclopramid 10 mg p.o / i.v. , Maximaldosis 30mg/d</li> <li>○ Ondansetron 4mg s.l. oder bei Chemotherapie Bolus: 8 mg i.v. als Kurzinfusion über 15 min, Maximaldosis 32 mg/d</li> </ul> <p>In der Schwangerschaft bevorzugt:</p> <ul style="list-style-type: none"> <li>○ Paracetamol</li> <li>○ Buscopan</li> <li>○ Omeprazol 20 - 40mg po</li> </ul> |  |
|-----------------------------------------------------------------------------------------------------------------------------------------------------------------------------------------------------------------------------------------------------------------------------------------------------------------------------------------------------------------------------------------------------------------------------------------------------------------------------------------------------------------------------------------------------------------------------------------------------------------------------------------------------------------------------------------------------------------------------------------------------------------------------------------------------------------------------------------------------------------------------------------------------------------------|--|

| Tab. S8 SOP Sonographie                                                                                                                                                                                                                                                                                                                                                                                                                                                   |                                                                                                                                                    |
|---------------------------------------------------------------------------------------------------------------------------------------------------------------------------------------------------------------------------------------------------------------------------------------------------------------------------------------------------------------------------------------------------------------------------------------------------------------------------|----------------------------------------------------------------------------------------------------------------------------------------------------|
| Informationstext aus der AP                                                                                                                                                                                                                                                                                                                                                                                                                                               | Items Auswahl in der APP                                                                                                                           |
| <ul style="list-style-type: none"> <li>○ Durchführung der Sonographie mit SIN Level-II</li> <li>○ Point-of-Care-Ultraschall Akutes Abdomen - fokussierte Abdomensonographie <ul style="list-style-type: none"> <li>- Aszites / freie Flüssigkeit</li> <li>- Ileuszeichen / pathologische Darmdistension, Pendelperistaltik, großer Flüssigkeitsgefüllter Magen</li> <li>- Intra-/extrahepatische Cholestase/ Cholezystitis</li> <li>- Pankreatitis</li> </ul> </li> </ul> | <ul style="list-style-type: none"> <li><input type="checkbox"/> Gesicherte Diagnose</li> <li><input type="checkbox"/> Unklarer Diagnose</li> </ul> |

|                                                                                                                                                                                                                                                                                                                                                                                                                                                                                                                                                                                                                                                                                                                                                                                                                                                      |  |
|------------------------------------------------------------------------------------------------------------------------------------------------------------------------------------------------------------------------------------------------------------------------------------------------------------------------------------------------------------------------------------------------------------------------------------------------------------------------------------------------------------------------------------------------------------------------------------------------------------------------------------------------------------------------------------------------------------------------------------------------------------------------------------------------------------------------------------------------------|--|
| <ul style="list-style-type: none"> <li>- Nierenversagen / Harnstau / Urolithiasis/ Harnverhalt</li> <li>- Beurteilung Leber (Abszess, RF)</li> <li>- Beurteilung Milz (Abszess, Einblutung, Ruptur)</li> <li>- Appendizitis (Kokardenphänomen, Wandverdickung, Abszess)</li> <li>- Sigmadivertikulitis (entzündliche Wandverdickung +/- Hyperämie, Darstellbare Divertikel, Abszess)</li> </ul> <ul style="list-style-type: none"> <li>○ Digitale Bilddokumentation</li> <li>○ Besprechung der Bilder mit Oberarzt/Facharzt (Innere Medizin/Radiologie/Allgemeinchirurgie) mit spezieller Erfahrung</li> <li>○ Notfallsonographie</li> <li>○ Verfassen des Befundberichtes</li> <li>○ Bei Veränderung des AZ / Verdachtsdiagnose evaluiere Kontroll-Sonographie und Indikation zur Durchführung einer zeitnahen CT-Untersuchung (&lt; 2h)</li> </ul> |  |
|------------------------------------------------------------------------------------------------------------------------------------------------------------------------------------------------------------------------------------------------------------------------------------------------------------------------------------------------------------------------------------------------------------------------------------------------------------------------------------------------------------------------------------------------------------------------------------------------------------------------------------------------------------------------------------------------------------------------------------------------------------------------------------------------------------------------------------------------------|--|

| <b>Tab. S9 SOP Spezifisches Management</b>                                                                                                                                                                                                                                                                                                                                                                                                                                                                                                                                                                                                                                                                                                        |                                                                                                                                                                                                                                                                                                                                                                                                                                                                                                                                                                                                                                                                                   |
|---------------------------------------------------------------------------------------------------------------------------------------------------------------------------------------------------------------------------------------------------------------------------------------------------------------------------------------------------------------------------------------------------------------------------------------------------------------------------------------------------------------------------------------------------------------------------------------------------------------------------------------------------------------------------------------------------------------------------------------------------|-----------------------------------------------------------------------------------------------------------------------------------------------------------------------------------------------------------------------------------------------------------------------------------------------------------------------------------------------------------------------------------------------------------------------------------------------------------------------------------------------------------------------------------------------------------------------------------------------------------------------------------------------------------------------------------|
| Informationstext aus der APP                                                                                                                                                                                                                                                                                                                                                                                                                                                                                                                                                                                                                                                                                                                      | Items in der APP                                                                                                                                                                                                                                                                                                                                                                                                                                                                                                                                                                                                                                                                  |
| <p>0. Schmerzmanagement re-evaluieren! → SOP Schmerzmanagement</p> <p>1. Rücksprache Facharzt, falls bisher nicht erfolgt</p> <p>2. Entlassung aus Notaufnahme geplant:</p> <ul style="list-style-type: none"> <li>○ Überprüfe APU-Algorithmus auf Vollständigkeit von <ul style="list-style-type: none"> <li>- Anamnese</li> <li>- Körperlicher Untersuchung</li> <li>- Diagnostik</li> <li>- Therapie</li> </ul> </li> <li>○ Überprüfe Vollständigkeit der Entlassungsdokumentation</li> <li>○ Entlassungsgespräch führen</li> <li>○ Wiedervorstellung (ambulant/stationär) evaluieren und Termin vereinbaren</li> <li>○ Entlassung ausschließlich nach Rücksprache mit dem dazu im Klinik Kontext befugten Facharzt („Hintergrund“)</li> </ul> | <p><u>Schmerz</u></p> <p>Schmerzskala NRS</p> <p>0 _ 1 _ 2 _ 3 _ 4 _ 5 _ 6 _ 7 _ 8 _ 9 _ 10</p> <p>VAS 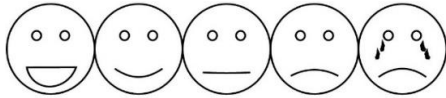</p> <p><u>Entlassung</u></p> <p><b>Nein</b> <input type="checkbox"/></p> <ul style="list-style-type: none"> <li>○ Observation in Notaufnahme</li> <li>○ Stationäre Aufnahme <ul style="list-style-type: none"> <li>○ Pat. Informiert</li> <li>○ Bettenmanagement/Station informiert</li> </ul> </li> <li>○ OP/Intervention <ul style="list-style-type: none"> <li>○ Aufklärung</li> <li>○ Post-Op Versorgung geklärt</li> </ul> </li> </ul> <p><b>Ja</b> <input type="checkbox"/></p> |



3. Antibiotische Therapie indiziert? Weitere spezifische medikamentöse Therapie?

- Akute Cholezystitis, akute Appendizitis, akute Divertikulitis, inkarzerierte Hernien
- Bei Zeichen der Infektion/Sepsis auch, wenn Fokus nicht sicher!
- Weitere spezifische medikamentöse Therapie mit Hintergrunddienst klären!

4. Stationäre Aufnahme geplant:

- Patientengespräch
- Level of care festlegen
- Frühzeitige Info an Bettenmanagement (lokale Regelungen)
- Info ad Station, Anordnungen festlegen, um Lücken zu vermeiden (Kreislaufüberwachung? Thromboseprophylaxe? Medikation? Kost?)
- Andere Berufsgruppen (insbesondere Pflege) einbeziehen und informieren

5. Direktverlegung in den OP oder Endoskopie geplant:

- Patientengespräch, Aufklärungsgespräch
- Einwilligung einholen (lokal übliche Bögen)
- Info an den OP-Koordinator/Endoskopieanmeldung, ggf. Team alarmieren
- Bei OP: Lokale Checkliste "OP-Vorbereitung" abarbeiten

Überprüfe APU-Algorithmus auf Vollständigkeit von

- Anamnese
- Körperlicher Untersuchung
- Diagnostik
- Therapie
- Überprüfe Vollständigkeit der Entlassungsdokumentation
- Entlassungsgespräch führen
- Wiedervorstellung (ambulant/stationär) evaluieren und Termin vereinbaren
- Entlassung ausschließlich nach Rücksprache mit dem dazu im Klinik Kontext befugten Facharzt („Hintergrund“)

Antibiotikagabe nötig? ja  nein

Behandlungsende: Datum/Uhrzeit der Anmeldung der Entlassung/Verlegung
